# Supplementary material for: Study on Debinding and Sintering Conditions in Extrusion-Based Additive Manufacturing of 316L and 316L + Cu
Source: MDPI journal article supplement (doi:10.3390/met13111858), 2023-11-07
Supplement: s1 [file s1]

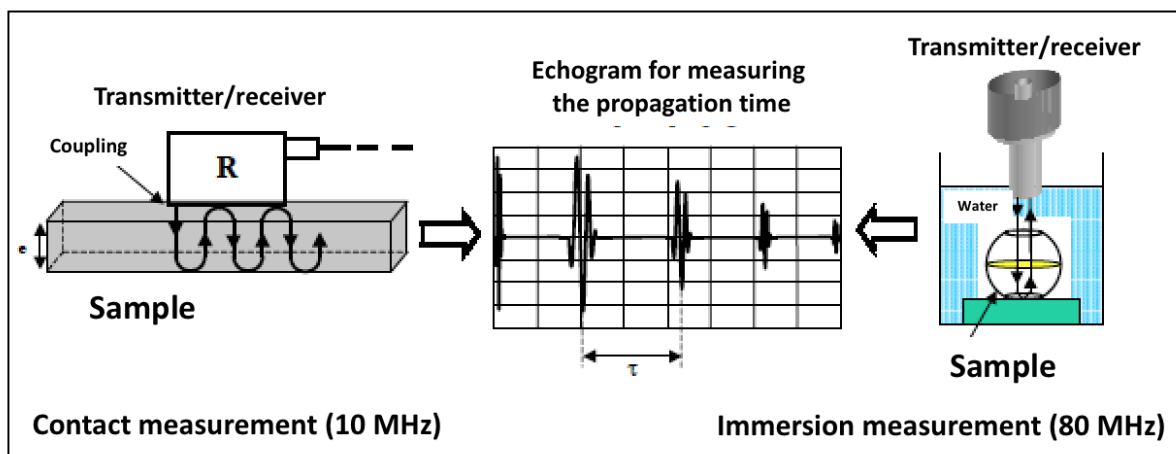

**Figure S1.** Representation of the ultrasonic method.

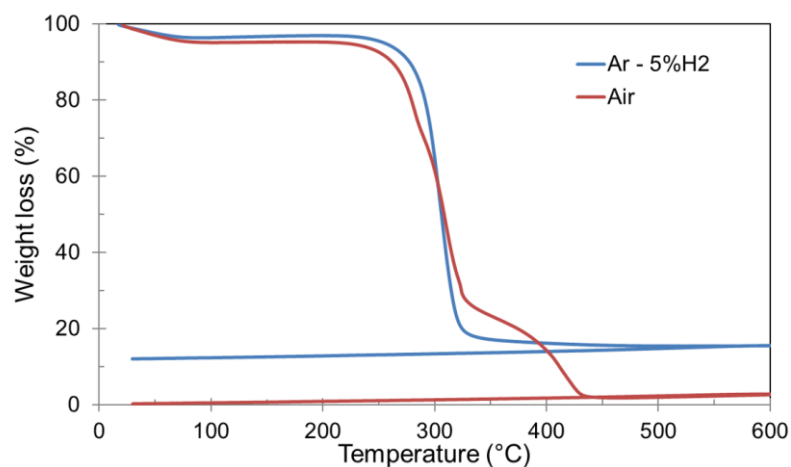

**Figure S2.** TGA of the methylcellulose under air and Ar/5%  $H_2$  atmosphere.

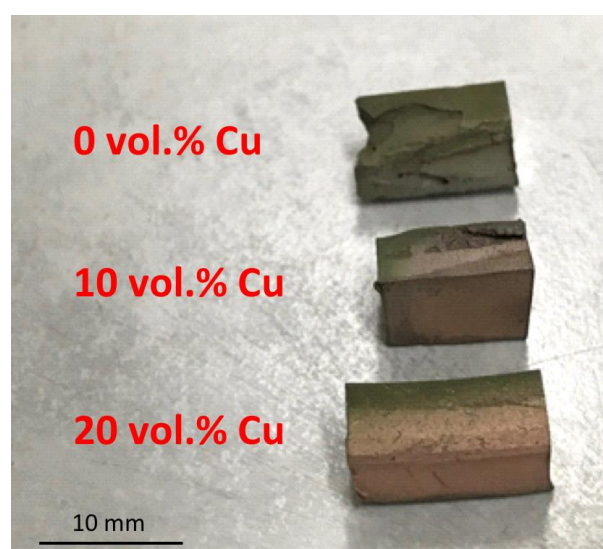

**Figure S3.** Photographs of 316L + Cu samples with different Cu contents.

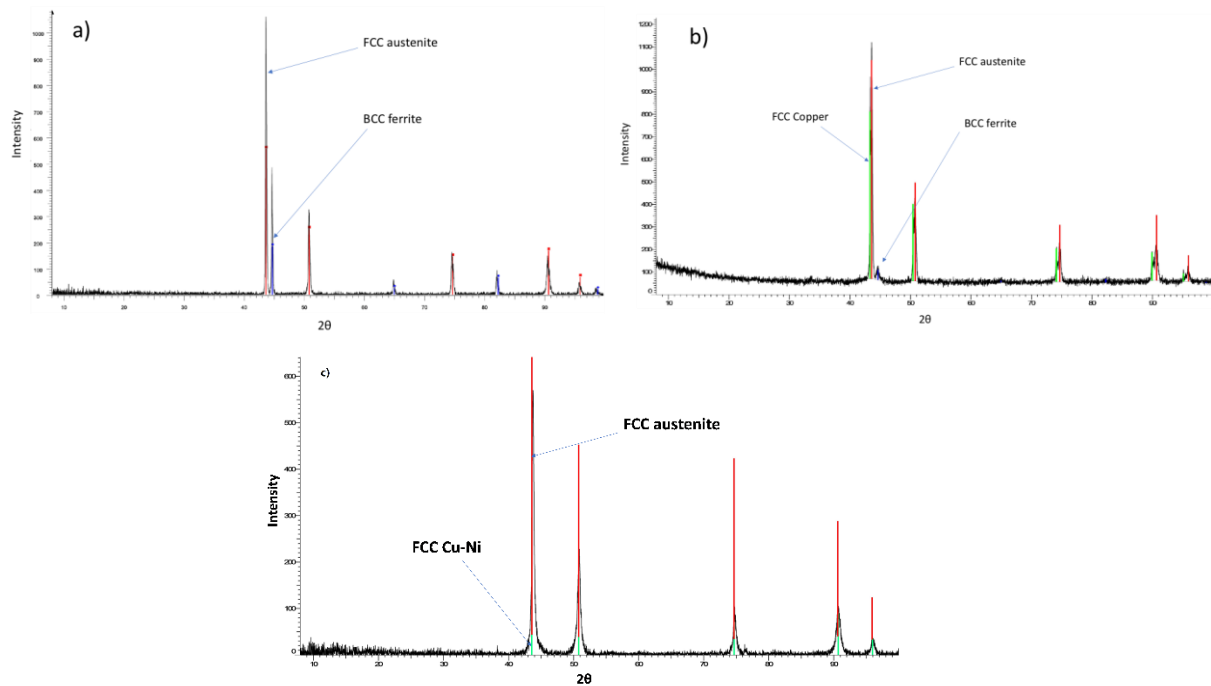

**Figure S4.** XRD diffractograms for (a) pure 316L powder, (b) sample before sintering, and (c) sample after sintering for 5 hours.

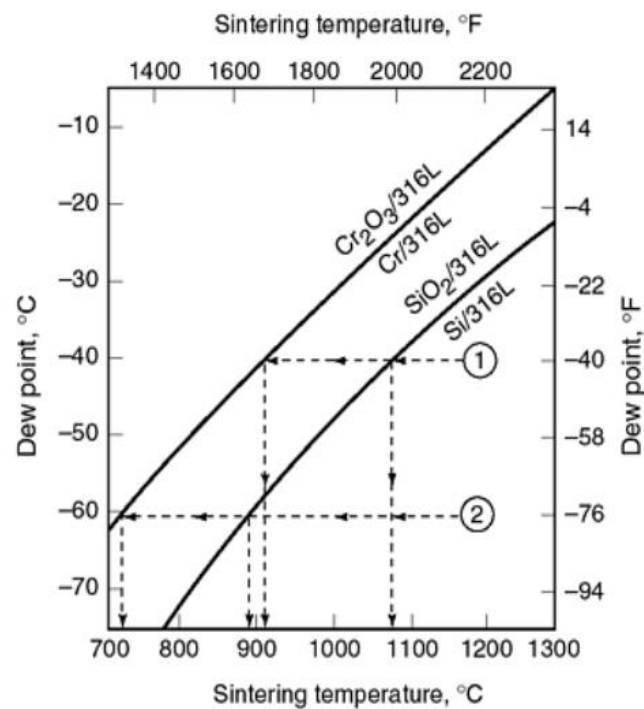

**Figure S5.** Dew points to reduce Cr and Si oxides at different temperatures.

**Table S1.** Printing parameters.

|                          |          |
|--------------------------|----------|
| Nozzle Size              | 0.564 mm |
| Layer height             | 0.28 mm  |
| Print bed temperature    | 20 °C    |
| Chamber temperature      | 20°C     |
| Retraction distance      | 3.2 mm   |
| Retraction speed         | 30 mm/s  |
| Costing distance         | 0.2 mm   |
| Retraction vertical lift | 0.2 mm   |

**Table S2.** Measured corrosion rates in 5% HCl of 316L + Cu samples.

| Copper Content | Sintering Dwell Time | Densification | Corrosion Rate<br>(g·h <sup>-1</sup> ·m <sup>-2</sup> ) |
|----------------|----------------------|---------------|---------------------------------------------------------|
| 0 %            | 5 h                  | 71 %          | 5.14                                                    |
|                | 10 h                 | 79 %          | 9.05                                                    |
| 10 %           | 5 h                  | 75 %          | 0.51                                                    |
|                | 10 h                 | 86 %          | 0.44                                                    |
| 20 %           | 5 h                  | 87 %          | 0.38                                                    |
|                | 10 h                 | 88 %          | 0.44                                                    |
| He et al. [30] | -                    | 93 %          | 0.22                                                    |
|                |                      | 98 %          | 0.08                                                    |
